# Supplementary material
Source: publisher figshare collection journal article supplement (https://karger.figshare.com/ndownloader/files/24089627)
Supplement: Supplementary file 1 [file 24089627]

## Sheet: TESTIS_Disease_Phenotypes
Supplementary Table S6. TESTIS sample: Output of Human Mouse - Disease Connection database at Mouse Genome Informatics (MGI 6.13; www.informatics.jax.org)
Abnormal murine phenotypes have yellow background. Annotations referring to the reproductive system and/or to mortality/aging are highlighted in columns J and K (yes).
	Organism	Gene Symbol	ID	Genetic Location	Genome Coordinates	Build	Gene Symbol		Abnormal Mouse Phenotypes			Reproductive system		Mortality/Aging		Associated Human Diseases
	mouse	Lgals4	MGI:107536		Chr7:28833854-28841708 (+)	GRCm38	Lgals4		adipose tissue
	mouse	Col1a1	MGI:88467	Chr11 D	Chr11:94936224-94953042 (+)	GRCm38	Col1a1		adipose tissue | behavior/neurological | cardiovascular system | cellular | craniofacial | digestive/alimentary system | embryo | growth/size/body | hearing/vestibular/ear | hematopoietic system | homeostasis/metabolism | immune system | integument | limbs/digits/tail | liver/biliary system | mortality/aging | muscle | neoplasm | nervous system | pigmentation | reproductive system | respiratory s…			yes		yes		Ehlers-Danlos syndrome | lung cancer | osteogenesis imperfecta type 1 | osteogenesis imperfecta type 2 | osteogenesis imperfecta type 3 | osteogenesis imperfecta type 4
	mouse	Lmna	MGI:96794		Chr3:88481148-88509932 (-)	GRCm38	Lmna		adipose tissue | behavior/neurological | cardiovascular system | cellular | craniofacial | digestive/alimentary system | endocrine/exocrine glands | growth/size/body | hearing/vestibular/ear | hematopoietic system | homeostasis/metabolism | immune system | integument | limbs/digits/tail | liver/biliary system | mortality/aging | muscle | nervous system | pigmentation | renal/urinary system | repr…			yes		yes		achalasia | Charcot-Marie-Tooth disease type 2B1 | congenital muscular dystrophy due to LMNA mutation | dilated cardiomyopathy 1A | Emery-Dreifuss muscular dystrophy | otitis media | progeria
	mouse	Jup	MGI:96650		Chr11:100368958-100397763 (-)	GRCm38	Jup		adipose tissue | behavior/neurological | cardiovascular system | cellular | embryo | growth/size/body | hematopoietic system | homeostasis/metabolism | immune system | integument | liver/biliary system | mortality/aging | muscle | respiratory system					yes		arrhythmogenic right ventricular dysplasia 12 | epidermolytic hyperkeratosis
	mouse	Sod1	MGI:98351	Chr16 B5-C3	Chr16:90220754-90226329 (+)	GRCm38	Sod1		adipose tissue | behavior/neurological | cardiovascular system | cellular | endocrine/exocrine glands | growth/size/body | hearing/vestibular/ear | hematopoietic system | homeostasis/metabolism | immune system | integument | liver/biliary system | mortality/aging | muscle | neoplasm | nervous system | reproductive system | skeleton | vision/eye			yes		yes		amyotrophic lateral sclerosis type 1 | dry eye syndrome | low tension glaucoma
	mouse	Fshr	MGI:95583	Chr17 E5	Chr17:88985170-89200612 (-)	GRCm38	Fshr		adipose tissue | behavior/neurological | cardiovascular system | cellular | endocrine/exocrine glands | growth/size/body | hematopoietic system | homeostasis/metabolism | immune system | integument | limbs/digits/tail | mortality/aging | neoplasm | nervous system | reproductive system | skeleton			yes		yes
	mouse	Fbn1	MGI:95489	Chr2 F	Chr2:125300594-125506485 (-)	GRCm38	Fbn1		adipose tissue | behavior/neurological | cardiovascular system | craniofacial | embryo | endocrine/exocrine glands | growth/size/body | hematopoietic system | homeostasis/metabolism | immune system | integument | limbs/digits/tail | mortality/aging | muscle | nervous system | renal/urinary system | reproductive system | respiratory system | skeleton			yes		yes		heart disease | Marfan syndrome | pulmonary emphysema | systemic scleroderma | Weill-Marchesani syndrome
	mouse	Mc2r	MGI:96928		Chr18:68406907-68429251 (-)	GRCm38	Mc2r		adipose tissue | behavior/neurological | cardiovascular system | endocrine/exocrine glands | hematopoietic system | homeostasis/metabolism | immune system | mortality/aging | nervous system					yes
	mouse	Gatm	MGI:1914342		Chr2:122594473-122611277 (-)	GRCm38	Gatm		adipose tissue | behavior/neurological | cellular | digestive/alimentary system | endocrine/exocrine glands | growth/size/body | hematopoietic system | homeostasis/metabolism | immune system | integument | liver/biliary system | mortality/aging | muscle | nervous system | renal/urinary system | reproductive system | skeleton			yes		yes
	mouse	Prkaa2	MGI:1336173		Chr4:105029874-105109890 (-)	GRCm38	Prkaa2		adipose tissue | behavior/neurological | cellular | endocrine/exocrine glands | growth/size/body | hematopoietic system | homeostasis/metabolism | immune system | muscle | nervous system | renal/urinary system
	mouse	Plin2	MGI:87920		Chr4:86648386-86670060 (-)	GRCm38	Plin2		adipose tissue | behavior/neurological | endocrine/exocrine glands | growth/size/body | hematopoietic system | homeostasis/metabolism | immune system | integument | liver/biliary system | reproductive system | vision/eye			yes
	mouse	Prkar1a	MGI:104878		Chr11:109649405-109669656 (+)	GRCm38	Prkar1a		adipose tissue | cardiovascular system | cellular | craniofacial | digestive/alimentary system | embryo | endocrine/exocrine glands | growth/size/body | hematopoietic system | homeostasis/metabolism | immune system | liver/biliary system | mortality/aging | muscle | neoplasm | nervous system | pigmentation | reproductive system | respiratory system | skeleton | vision/eye			yes		yes		Carney complex | follicular thyroid carcinoma | primary pigmented nodular adrenocortical disease
	mouse	Angptl4	MGI:1888999		Chr17:33774900-33781575 (-)	GRCm38	Angptl4		adipose tissue | cardiovascular system | digestive/alimentary system | hematopoietic system | homeostasis/metabolism | immune system | mortality/aging | vision/eye					yes
	mouse	Ldha	MGI:96759		Chr7:46845804-46855627 (+)	GRCm38	Ldha		adipose tissue | cardiovascular system | growth/size/body | hematopoietic system | homeostasis/metabolism | immune system | liver/biliary system | mortality/aging | respiratory system					yes
	mouse	Rgs5	MGI:1098434	Chr1 H2	Chr1:169655501-169695813 (+)	GRCm38	Rgs5		adipose tissue | cardiovascular system | growth/size/body | hematopoietic system | immune system
	mouse	Atpif1	MGI:1196457		Chr4:132530555-132533659 (-)	GRCm38	Atpif1		adipose tissue | growth/size/body | homeostasis/metabolism
	mouse	Aldh2	MGI:99600	Chr5 F-G1	Chr5:121566027-121593824 (-)	GRCm38	Aldh2		behavior/neurological | cardiovascular system | cellular | growth/size/body | hematopoietic system | homeostasis/metabolism | immune system | integument | liver/biliary system | mortality/aging | muscle | neoplasm | nervous system | pigmentation | renal/urinary system | reproductive system | skeleton			yes		yes
	mouse	Cth	MGI:1339968		Chr3:157894248-157925077 (-)	GRCm38	Cth		behavior/neurological | cardiovascular system | cellular | growth/size/body | homeostasis/metabolism | liver/biliary system | mortality/aging | muscle | renal/urinary system | vision/eye					yes		cystathioninuria
	mouse	Cryab	MGI:88516		Chr9:50751325-50756636 (+)	GRCm38	Cryab		behavior/neurological | cardiovascular system | cellular | homeostasis/metabolism | liver/biliary system | mortality/aging | muscle | respiratory system | vision/eye					yes		cataract 16 multiple types | myofibrillar myopathy 2
	mouse	F5	MGI:88382		Chr1:164151838-164220277 (+)	GRCm38	F5		behavior/neurological | cardiovascular system | embryo | homeostasis/metabolism | integument | liver/biliary system | mortality/aging					yes
	mouse	Bdnf	MGI:88145		Chr2:109674700-109727007 (+)	GRCm38	Bdnf		behavior/neurological | cellular | craniofacial | digestive/alimentary system | endocrine/exocrine glands | growth/size/body | hearing/vestibular/ear | homeostasis/metabolism | integument | mortality/aging | nervous system | reproductive system | respiratory system | taste/olfaction | vision/eye			yes		yes
	mouse	Cftr	MGI:88388	Chr6 A3	Chr6:18170687-18322768 (+)	GRCm38	Cftr		behavior/neurological | cellular | craniofacial | digestive/alimentary system | endocrine/exocrine glands | growth/size/body | hematopoietic system | homeostasis/metabolism | immune system | liver/biliary system | mortality/aging | reproductive system | respiratory system | vision/eye			yes		yes		cystic fibrosis
	mouse	Uchl5	MGI:1914848	Chr1 F	Chr1:143777272-143807466 (+)	GRCm38	Uchl5		behavior/neurological | cellular | embryo | growth/size/body | mortality/aging | nervous system					yes
	mouse	Dnase1	MGI:103157	Chr16 A1-A3	Chr16:4036973-4040024 (+)	GRCm38	Dnase1		behavior/neurological | cellular | hearing/vestibular/ear | hematopoietic system | homeostasis/metabolism | immune system | mortality/aging | renal/urinary system					yes		systemic lupus erythematosus
	mouse	Acads	MGI:87868		Chr5:115110299-115119346 (-)	GRCm38	Acads		behavior/neurological | cellular | homeostasis/metabolism | liver/biliary system | muscle | nervous system | renal/urinary system							short chain acyl-CoA dehydrogenase deficiency
	mouse	Araf	MGI:88065	ChrX A2-A3.1	ChrX:20797814-20860519 (+)	GRCm38	Araf		behavior/neurological | digestive/alimentary system | endocrine/exocrine glands | growth/size/body | hematopoietic system | immune system | mortality/aging | muscle					yes
	mouse	Avpr2	MGI:88123		ChrX:73891798-73894428 (+)	GRCm38	Avpr2		behavior/neurological | growth/size/body | hematopoietic system | homeostasis/metabolism | integument | mortality/aging | renal/urinary system					yes		nephrogenic diabetes insipidus
	mouse	Abcd2	MGI:1349467	Chr15 E-F	Chr15:91145871-91191799 (-)	GRCm38	Abcd2		behavior/neurological | hematopoietic system | homeostasis/metabolism | immune system | nervous system
	mouse	Anxa4	MGI:88030		Chr6:86736840-86793584 (-)	GRCm38	Anxa4		behavior/neurological | renal/urinary system
	mouse	Traf6	MGI:108072		Chr2:101678429-101701669 (+)	GRCm38	Traf6		cardiovascular system | cellular | craniofacial | digestive/alimentary system | embryo | endocrine/exocrine glands | growth/size/body | hearing/vestibular/ear | hematopoietic system | homeostasis/metabolism | immune system | integument | limbs/digits/tail | liver/biliary system | mortality/aging | muscle | nervous system | pigmentation | renal/urinary system | reproductive system | skeleton | vis…			yes		yes		hypohidrotic ectodermal dysplasia
	mouse	Vcl	MGI:98927		Chr14:20929398-21033676 (+)	GRCm38	Vcl		cardiovascular system | cellular | craniofacial | digestive/alimentary system | embryo | growth/size/body | limbs/digits/tail | mortality/aging | muscle | nervous system					yes
	mouse	Tfrc	MGI:98822		Chr16:32608920-32632794 (+)	GRCm38	Tfrc		cardiovascular system | cellular | digestive/alimentary system | embryo | growth/size/body | hematopoietic system | homeostasis/metabolism | immune system | integument | liver/biliary system | mortality/aging | nervous system					yes
	mouse	Plg	MGI:97620		Chr17:12378609-12419384 (+)	GRCm38	Plg		cardiovascular system | cellular | digestive/alimentary system | endocrine/exocrine glands | growth/size/body | hematopoietic system | homeostasis/metabolism | immune system | integument | liver/biliary system | mortality/aging | neoplasm | nervous system | renal/urinary system | reproductive system | respiratory system | vision/eye			yes		yes
	mouse	Aurkb	MGI:107168		Chr11:69045647-69051664 (+)	GRCm38	Aurkb		cardiovascular system | cellular | embryo | growth/size/body | homeostasis/metabolism | integument | liver/biliary system | mortality/aging | neoplasm | reproductive system			yes		yes
	mouse	Ccnd2	MGI:88314		Chr6:127125162-127152188 (-)	GRCm38	Ccnd2		cardiovascular system | cellular | endocrine/exocrine glands | homeostasis/metabolism | nervous system | reproductive system			yes
	mouse	Apoa1	MGI:88049	Chr9 A2-A4	Chr9:46228630-46230469 (+)	GRCm38	Apoa1		cardiovascular system | cellular | homeostasis/metabolism
	mouse	Gla	MGI:1347344	ChrX E-F1	ChrX:134588169-134601005 (-)	GRCm38	Gla		cardiovascular system | cellular | liver/biliary system | muscle | renal/urinary system							Fabry disease
	mouse	Srsf1	MGI:98283		Chr11:88047373-88053755 (+)	GRCm38	Srsf1		cardiovascular system | cellular | mortality/aging | muscle | nervous system | vision/eye					yes
	mouse	Nampt	MGI:1929865	Chr12 B1	Chr12:32820335-32853369 (+)	GRCm38	Nampt		cardiovascular system | embryo | endocrine/exocrine glands | growth/size/body | hematopoietic system | homeostasis/metabolism | immune system | integument | mortality/aging | nervous system					yes
	mouse	Hadha	MGI:2135593		Chr5:30118304-30154980 (-)	GRCm38	Hadha		cardiovascular system | embryo | growth/size/body | homeostasis/metabolism | liver/biliary system | mortality/aging | muscle | renal/urinary system					yes
	mouse	Capza2	MGI:106222		Chr6:17637098-17666534 (+)	GRCm38	Capza2		cardiovascular system | endocrine/exocrine glands | immune system | liver/biliary system | mortality/aging | nervous system | skeleton					yes
	mouse	Anxa2	MGI:88246		Chr9:69453683-69491792 (+)	GRCm38	Anxa2		cardiovascular system | growth/size/body | hematopoietic system | homeostasis/metabolism
	mouse	Acadl	MGI:87866		Chr1:66830839-66863277 (-)	GRCm38	Acadl		cardiovascular system | homeostasis/metabolism | liver/biliary system | mortality/aging | renal/urinary system | reproductive system			yes		yes		very long chain acyl-CoA dehydrogenase deficiency
	mouse	Ephx2	MGI:99500	Chr14 D	Chr14:66084374-66124500 (-)	GRCm38	Ephx2		cardiovascular system | homeostasis/metabolism | vision/eye
	mouse	Idh2	MGI:96414		Chr7:80094846-80115392 (-)	GRCm38	Idh2		cardiovascular system | limbs/digits/tail | neoplasm | skeleton
	mouse	Tgs1	MGI:2151797	Chr4 A1	Chr4:3574875-3616619 (+)	GRCm38	Tgs1		cellular | embryo | growth/size/body | mortality/aging					yes
	mouse	Arhgef2	MGI:103264	Chr3 F1	Chr3:88605966-88648052 (+)	GRCm38	Arhgef2		cellular | growth/size/body | hematopoietic system | immune system | nervous system							neurodevelopmental disorder with midbrain and hindbrain malformations
	mouse	Oxct1	MGI:1914291	Chr15 A1	Chr15:4026428-4155344 (+)	GRCm38	Oxct1		cellular | homeostasis/metabolism | mortality/aging | muscle | nervous system					yes
	mouse	Taldo1	MGI:1274789	Chr7 F3-F4	Chr7:141392199-141402968 (+)	GRCm38	Taldo1		cellular | homeostasis/metabolism | reproductive system			yes
	mouse	Dcps	MGI:1916555		Chr9:35124414-35175987 (-)	GRCm38	Dcps		embryo | growth/size/body | mortality/aging					yes
	mouse	Star	MGI:102760		Chr8:25808513-25815982 (+)	GRCm38	Star		endocrine/exocrine glands | growth/size/body | homeostasis/metabolism | mortality/aging | reproductive system			yes		yes		congenital adrenal hyperplasia
	mouse	Myoz1	MGI:1929471		Chr14:20649107-20656540 (-)	GRCm38	Myoz1		growth/size/body | homeostasis/metabolism | limbs/digits/tail | muscle | skeleton
	mouse	Hmgcr	MGI:96159		Chr13:96648967-96670936 (-)	GRCm38	Hmgcr		growth/size/body | homeostasis/metabolism | liver/biliary system | mortality/aging					yes
	mouse	Ifrd1	MGI:1316717		Chr12:40203129-40223189 (-)	GRCm38	Ifrd1		growth/size/body | muscle
	mouse	Ctsh	MGI:107285		Chr9:90054267-90076095 (+)	GRCm38	Ctsh		growth/size/body | reproductive system | respiratory system | vision/eye			yes
	mouse	Arg1	MGI:88070		Chr10:24915207-24927470 (-)	GRCm38	Arg1		hematopoietic system | homeostasis/metabolism | immune system | liver/biliary system | mortality/aging | nervous system					yes		hyperargininemia
	mouse	Hpx	MGI:105112	Chr7 F1	Chr7:105591611-105600116 (-)	GRCm38	Hpx		hematopoietic system | homeostasis/metabolism | renal/urinary system
	mouse	Fabp1	MGI:95479		Chr6:71199888-71205023 (+)	GRCm38	Fabp1		homeostasis/metabolism | liver/biliary system
	mouse	Alb	MGI:87991		Chr5:90460897-90476602 (+)	GRCm38	Alb		homeostasis/metabolism | mortality/aging					yes
	mouse	Renbp	MGI:105940		ChrX:73922121-73930850 (-)	GRCm38	Renbp		homeostasis/metabolism | renal/urinary system
	mouse	Pccb	MGI:1914154		Chr9:100982032-101034898 (-)	GRCm38	Pccb		mortality/aging					yes
	mouse	Cct3	MGI:104708	Chr3 F	Chr3:88297135-88321766 (+)	GRCm38	Cct3		mortality/aging					yes
	mouse	Pdxk	MGI:1351869		Chr10:78436747-78464948 (-)	GRCm38	Pdxk		mortality/aging					yes
	mouse	Sdsl	MGI:2182607		Chr5:120458186-120472810 (-)	GRCm38	Sdsl		skeleton
	mouse	Idh3a	MGI:1915084		Chr9:54586511-54604662 (+)	GRCm38	Idh3a		vision/eye
	human	FSHR	2492	Chr2 p16.3	Chr2:48953161-49154527 (-)	GRCh38.p7	FSHR									46 XX gonadal dysgenesis | ovarian hyperstimulation syndrome
	human	PRKAR1A	5573	Chr17 q24.2	Chr17:68413623-68551316 (+)	GRCh38.p7	PRKAR1A									acrodysostosis | Carney complex | primary pigmented nodular adrenocortical disease
	human	GATM	2628	Chr15 q21.1	Chr15:45361124-45402317 (-)	GRCh38.p7	GATM									AGAT deficiency
	human	SOD1	6647	Chr21 q22.11	Chr21:31659622-31668931 (+)	GRCh38.p7	SOD1									amyotrophic lateral sclerosis type 1
	human	JUP	3728	Chr17 q21.2	Chr17:41754607-41786853 (-)	GRCh38.p7	JUP									arrhythmogenic right ventricular dysplasia 12
	human	LMNA	4000	Chr1 q22	Chr1:156082546-156140089 (+)	GRCh38.p7	LMNA									autosomal dominant Emery-Dreifuss muscular dystrophy 2 | autosomal recessive Emery-Dreifuss muscular dystrophy 3 | Charcot-Marie-Tooth disease type 2B1 | congenital muscular dystrophy due to LMNA mutation | dilated cardiomyopathy 1A | lethal restrictive dermopathy | progeria
	human	FBN1	2200	Chr15 q21.1	Chr15:48408306-48645788 (-)	GRCh38.p7	FBN1									autosomal dominant isolated ectopia lentis 1 | Marfan syndrome | Weill-Marchesani syndrome
	human	ATP6V1A	523	Chr3 q13.31	Chr3:113747019-113812058 (+)	GRCh38.p7	ATP6V1A									autosomal recessive cutis laxa type IID
	human	CFTR	1080	Chr7 q31.2	Chr7:117478367-117668665 (+)	GRCh38.p7	CFTR									bronchiectasis | cystic fibrosis | pancreatitis
	human	F5	2153	Chr1 q24.2	Chr1:169511954-169586632 (-)	GRCh38.p7	F5									Budd-Chiari syndrome | factor V deficiency
	human	CRYAB	1410	Chr11 q23.1	Chr11:111908620-111913213 (-)	GRCh38.p7	CRYAB									cataract 16 multiple types | dilated cardiomyopathy 1II | fatal infantile hypertonic myofibrillar myopathy | myofibrillar myopathy 2
	human	STAR	6770	Chr8 p11.23	Chr8:38141747-38151265 (-)	GRCh38.p7	STAR									congenital adrenal hyperplasia
	human	CTH	1491	Chr1 p31.1	Chr1:70411218-70441949 (+)	GRCh38.p7	CTH									cystathioninuria
	human	IDH2	3418	Chr15 q26.1	Chr15:90083978-90102554 (-)	GRCh38.p7	IDH2									D-2-hydroxyglutaric aciduria
	human	VCL	7414	Chr10 q22.2	Chr10:73998114-74120160 (+)	GRCh38.p7	VCL									dilated cardiomyopathy 1W | hypertrophic cardiomyopathy 15
	human	RGS5	8490	Chr1 q23.3	Chr1:163142299-163321791 (-)	GRCh38.p7	RGS5									essential hypertension
	human	GLA	2717	ChrX q22.1	ChrX:101397791-101408013 (-)	GRCh38.p7	GLA									Fabry disease
	human	EPHX2	2053	Chr8 p21.2-p21.1	Chr8:27491002-27597559 (+)	GRCh38.p7	EPHX2									familial hypercholesterolemia
	human	APOA1	335	Chr11 q23.3	Chr11:116835751-116837950 (-)	GRCh38.p7	APOA1									familial visceral amyloidosis
	human	ARG1	383	Chr6 q23.2	Chr6:131573159-131584332 (+)	GRCh38.p7	ARG1									hyperargininemia
	human	ACO2	50	Chr22 q13.2	Chr22:41469125-41528989 (+)	GRCh38.p7	ACO2									infantile cerebellar-retinal degeneration
	human	AVPR2	554	ChrX q28	ChrX:153902531-153907166 (+)	GRCh38.p7	AVPR2									nephrogenic diabetes insipidus
	human	ARHGEF2	9181	Chr1 q22	Chr1:155946839-155991263 (-)	GRCh38.p7	ARHGEF2									neurodevelopmental disorder with midbrain and hindbrain malformations
	human	PCCB	5096	Chr3 q22.3	Chr3:136250325-136330171 (+)	GRCh38.p7	PCCB									propionic acidemia
	human	ACADS	35	Chr12 q24.31	Chr12:120725738-120740008 (+)	GRCh38.p7	ACADS									short chain acyl-CoA dehydrogenase deficiency
	human	DNASE1	1773	Chr16 p13.3	Chr16:3611705-3665472 (+)	GRCh38.p7	DNASE1									systemic lupus erythematosus
	mouse	Duox1	MGI:2139422		Chr2:122315672-122347972 (+)	GRCm38	Duox1
	mouse	Lmcd1	MGI:1353635		Chr6:112273758-112330423 (+)	GRCm38	Lmcd1
	mouse	Fmo1	MGI:1310002	Chr1 H1	Chr1:162829561-162866548 (-)	GRCm38	Fmo1
	mouse	Psmb4	MGI:1098257	Chr3 F2	Chr3:94884324-94886958 (-)	GRCm38	Psmb4
	mouse	Mdh2	MGI:97050		Chr5:135778649-135790386 (+)	GRCm38	Mdh2
	mouse	Slc22a7	MGI:1859559	Chr17 C	Chr17:46432185-46438477 (-)	GRCm38	Slc22a7
	mouse	Thop1	MGI:1354165		Chr10:81070083-81082360 (+)	GRCm38	Thop1
	mouse	Tpm4	MGI:2449202		Chr8:72135292-72153129 (+)	GRCm38	Tpm4
	mouse	Aco2	MGI:87880		Chr15:81872463-81915137 (+)	GRCm38	Aco2
	mouse	Rnf114	MGI:1933159	Chr2 H3	Chr2:167492645-167516169 (+)	GRCm38	Rnf114
	mouse	Rpn1	MGI:98084		Chr6:88084482-88105304 (+)	GRCm38	Rpn1
	mouse	Atp6v1a	MGI:1201780	Chr16 B4	Chr16:44085402-44139705 (-)	GRCm38	Atp6v1a
	mouse	Gmppa	MGI:1916330	Chr1 C3	Chr1:75435930-75443179 (+)	GRCm38	Gmppa
	human	FABP1	2168	Chr2 p11.2	Chr2:88122982-88128131 (-)	GRCh38.p7	FABP1
	human	HPX	3263	Chr11 p15.4	Chr11:6431038-6441024 (-)	GRCh38.p7	HPX
	human	DUOX1	53905	Chr15 q21.1	Chr15:45129994-45165578 (+)	GRCh38.p7	DUOX1
	human	ATP5IF1	93974	Chr1 p35.3	Chr1:28236091-28238105 (+)	GRCh38.p7	ATP5IF1
	human	ABCD2	225	Chr12 q12	Chr12:39530966-39651333 (-)	GRCh38.p7	ABCD2
	human	LMCD1	29995	Chr3 p25.3	Chr3:8501807-8568125 (+)	GRCh38.p7	LMCD1
	human	DCPS	28960	Chr11 q24.2	Chr11:126303301-126345754 (+)	GRCh38.p7	DCPS
	human	TALDO1	6888	Chr11 p15.5	Chr11:747432-765024 (+)	GRCh38.p7	TALDO1
	human	FMO1	2326	Chr1 q24.3	Chr1:171248471-171285978 (+)	GRCh38.p7	FMO1
	human	CAPZA2	830	Chr7 q31.2	Chr7:116862478-116919261 (+)	GRCh38.p7	CAPZA2
	human	CTSH	1512	Chr15 q25.1	Chr15:78921750-78945098 (-)	GRCh38.p7	CTSH
	human	RENBP	5973	ChrX q28	ChrX:153935263-153944780 (-)	GRCh38.p7	RENBP
	human	PSMB4	5692	Chr1 q21.3	Chr1:151399565-151401936 (+)	GRCh38.p7	PSMB4
	human	MDH2	4191	Chr7 q11.23	Chr7:76048019-76067508 (+)	GRCh38.p7	MDH2
	human	SLC22A7	10864	Chr6 p21.1	Chr6:43295694-43305538 (+)	GRCh38.p7	SLC22A7
	human	SDSL	113675	Chr12 q24.13	Chr12:113422265-113438277 (+)	GRCh38.p7	SDSL
	human	THOP1	7064	Chr19 p13.3	Chr19:2785460-2813604 (+)	GRCh38.p7	THOP1
	human	TPM4	7171	Chr19 p13.12-p13.11	Chr19:16067507-16103005 (+)	GRCh38.p7	TPM4
	human	PLG	5340	Chr6 q26	Chr6:160702193-160754054 (+)	GRCh38.p7	PLG
	human	LGALS4	3960	Chr19 q13.2	Chr19:38801671-38813544 (-)	GRCh38.p7	LGALS4
	human	ACADL	33	Chr2 q34	Chr2:210187990-210225491 (-)	GRCh38.p7	ACADL
	human	MC2R	4158	Chr18 p11.21	Chr18:13882042-13915707 (-)	GRCh38.p7	MC2R
	human	TGS1	96764	Chr8 q12.1	Chr8:55773232-55826445 (+)	GRCh38.p7	TGS1
	human	MYOZ1	58529	Chr10 q22.2	Chr10:73631612-73641757 (-)	GRCh38.p7	MYOZ1
	human	ALB	213	Chr4 q13.3	Chr4:73404255-73421412 (+)	GRCh38.p7	ALB
	human	NAMPT	10135	Chr7 q22.3	Chr7:106248285-106285732 (-)	GRCh38.p7	NAMPT
	human	TRAF6	7189	Chr11 p12	Chr11:36483767-36510313 (-)	GRCh38.p7	TRAF6
	human	IDH3A	3419	Chr15 q25.1	Chr15:78149326-78170542 (+)	GRCh38.p7	IDH3A
	human	IFRD1	3475	Chr7 q31.1	Chr7:112423144-112477203 (+)	GRCh38.p7	IFRD1
	human	CCT3	7203	Chr1 q22	Chr1:156308961-156338415 (-)	GRCh38.p7	CCT3
	human	ANXA2	302	Chr15 q22.2	Chr15:60347151-60398025 (-)	GRCh38.p7	ANXA2
	human	ANXA4	307	Chr2 p13.3	Chr2:69643805-69826477 (+)	GRCh38.p7	ANXA4
	human	PDXK	8566	Chr21 q22.3	Chr21:43719097-43762307 (+)	GRCh38.p7	PDXK
	human	OXCT1	5019	Chr5 p13.1	Chr5:41730065-41870689 (-)	GRCh38.p7	OXCT1
	human	RNF114	55905	Chr20 q13.13	Chr20:49936377-49953885 (+)	GRCh38.p7	RNF114
	human	RPN1	6184	Chr3 q21.3	Chr3:128619970-128650876 (-)	GRCh38.p7	RPN1
	human	PRKAA2	5563	Chr1 p32.2	Chr1:56645317-56715335 (+)	GRCh38.p7	PRKAA2
	human	HADHA	3030	Chr2 p23.3	Chr2:26190635-26244726 (-)	GRCh38.p7	HADHA
	human	ARAF	369	ChrX p11.3	ChrX:47561100-47571921 (+)	GRCh38.p7	ARAF
	human	ANGPTL4	51129	Chr19 p13.2	Chr19:8364127-8374375 (+)	GRCh38.p7	ANGPTL4
	human	SRSF1	6426	Chr17 q22	Chr17:58000919-58007346 (-)	GRCh38.p7	SRSF1
	human	HMGCR	3156	Chr5 q13.3	Chr5:75336334-75362101 (+)	GRCh38.p7	HMGCR
	human	CCND2	894	Chr12 p13.32	Chr12:4273736-4305356 (+)	GRCh38.p7	CCND2
	human	PLIN2	123	Chr9 p22.1	Chr9:19108391-19127606 (-)	GRCh38.p7	PLIN2
	human	AURKB	9212	Chr17 p13.1	Chr17:8204731-8210768 (-)	GRCh38.p7	AURKB
	human	ALDH2	217	Chr12 q24.12	Chr12:111766887-111809985 (+)	GRCh38.p7	ALDH2
	human	GMPPA	29926	Chr2 q35	Chr2:219498865-219506996 (+)	GRCh38.p7	GMPPA
	human	TFRC	7037	Chr3 q29	Chr3:196049284-196082161 (-)	GRCh38.p7	TFRC
	human	UCHL5	51377	Chr1 q31.2	Chr1:193012366-193060140 (-)	GRCh38.p7	UCHL5
	human	LDHA	3939	Chr11 p15.1	Chr11:18394389-18408218 (+)	GRCh38.p7	LDHA
	human	BDNF	627	Chr11 p14.1	Chr11:27654893-27722058 (-)	GRCh38.p7	BDNF
